# Supplementary material
Source: publisher figshare collection journal article supplement (https://geolsoc.figshare.com/ndownloader/files/5424623)
Supplement: Supplementary file 1 [file 5424623]

Sample ID	NED01_1_2	NED01_2_2	NED01_2_4	NED01_3_2	NED01_3_5	NED01_3_6	NED01_4_1	NED01_5_2	NED01_5_3	NED03_1_2	NED03_2_2	NED03_3_1	Sample ID	NED03_5_3	NED07_2_1	NED07_2_2	NED07_4_1	NED07_4_2	NED07_R_13	NED07_R_15	NED12_1_1	NED12_1_4	NED12_3_2	NED12_4_3	NED12_4_6
Wt %	-	-	-	-	-	-	-	-	-	-	-	-	Wt %	-	-	-	-	-	-	-	-	-	-	-	-
SiO2	39.468	38.968	39.142	39.965	39.099	38.662	34.973	38.775	37.166	38.815	39.150	38.679	SiO2	38.822	41.136	40.450	36.483	39.907	41.184	40.850	38.856	38.618	36.282	36.404	36.908
TiO2	3.867	4.033	3.983	3.152	4.082	3.967	3.510	4.075	4.306	3.820	3.966	4.107	TiO2	3.897	2.195	1.947	4.056	2.199	2.383	2.353	4.494	4.386	4.652	3.607	4.447
Al2O3	13.600	14.088	13.989	14.491	14.192	14.217	14.542	14.135	15.907	14.415	14.192	14.466	Al2O3	14.114	11.816	11.672	14.116	11.920	11.566	11.629	12.653	13.219	13.881	15.649	13.937
FeO	4.962	5.224	4.865	7.271	5.409	5.336	8.742	5.168	6.741	6.310	4.943	4.963	FeO	6.261	2.893	2.776	13.541	3.066	3.073	2.924	6.101	6.496	14.387	7.295	13.456
MnO	0.038	0.014	0.000	0.009	0.030	0.016	0.072	0.017	0.027	0.060	0.027	0.029	MnO	0.054	0.000	0.000	0.067	0.012	0.036	0.018	0.035	0.034	0.212	0.033	0.126
MgO	21.737	21.523	21.663	19.324	21.972	21.657	21.946	21.269	19.624	21.386	21.650	21.464	MgO	21.616	24.153	24.237	14.533	23.881	24.338	24.535	20.804	20.725	15.555	19.290	16.140
CaO	0.028	0.075	0.015	0.012	0.029	0.038	0.000	0.046	0.007	0.008	0.027	0.000	CaO	0.005	0.000	0.000	0.009	0.000	0.046	0.045	0.001	0.000	0.003	0.000	0.023
Na2O	0.122	0.141	0.132	0.268	0.235	0.192	0.201	0.119	0.173	0.205	0.122	0.122	Na2O	0.213	0.063	0.099	0.076	0.094	0.063	0.067	0.183	0.132	0.311	0.209	0.268
K2O	10.021	9.808	9.925	9.648	9.866	9.765	7.760	9.766	9.716	9.518	9.928	9.952	K2O	9.686	10.178	10.269	9.616	9.986	10.562	10.533	9.962	10.023	9.395	9.854	9.313
Total	93.840	93.870	93.710	94.140	94.91	93.850	91.750	93.370	93.670	94.540	94.010	93.780	Total	94.670	92.430	91.450	92.500	91.070	93.250	92.950	93.090	93.630	94.680	92.340	94.620
# ions based on 11 O	-	-	-	-	-	-	-	-	-	-	-	-	# ions based on 11 O	-	-	-	-	-	-	-	-	-	-	-	-
Si	2.858	2.823	2.836	2.900	2.806	2.804	2.632	2.823	2.722	2.803	2.828	2.804	Si	2.803	2.988	2.975	2.801	2.949	2.978	2.963	2.859	2.830	2.737	2.719	2.766
Ti	0.211	0.220	0.217	0.172	0.220	0.216	0.199	0.223	0.237	0.207	0.216	0.224	Ti	0.212	0.120	0.108	0.234	0.122	0.130	0.128	0.249	0.242	0.264	0.203	0.251
Al	1.161	1.203	1.194	1.239	1.200	1.215	1.290	1.213	1.373	1.227	1.208	1.236	Al	1.201	1.012	1.012	1.277	1.038	0.986	0.994	1.097	1.142	1.234	1.378	1.231
Fe2+	0.300	0.316	0.295	0.441	0.325	0.324	0.550	0.315	0.413	0.381	0.299	0.301	Fe2+	0.378	0.176	0.171	0.869	0.190	0.186	0.177	0.375	0.398	0.908	0.456	0.843
Mn	0.002	0.001	0.000	0.001	0.002	0.001	0.005	0.001	0.002	0.004	0.002	0.002	Mn	0.003	0.000	0.000	0.004	0.001	0.002	0.001	0.002	0.002	0.014	0.002	0.008
Mg	2.346	2.324	2.339	2.090	2.351	2.342	2.462	2.308	2.142	2.302	2.332	2.319	Mg	2.327	2.615	2.657	1.663	2.631	2.623	2.653	2.282	2.264	1.749	2.148	1.803
Ca	0.002	0.006	0.001	0.001	0.002	0.003	0.000	0.004	0.001	0.001	0.002	0.000	Ca	0.000	0.000	0.000	0.001	0.000	0.004	0.003	0.000	0.000	0.000	0.000	0.002
Na	0.017	0.020	0.019	0.038	0.033	0.027	0.029	0.017	0.025	0.029	0.017	0.017	Na	0.030	0.009	0.140	0.011	0.013	0.009	0.009	0.026	0.019	0.045	0.030	0.039
K	0.926	0.906	0.917	0.893	0.903	0.904	0.745	0.907	0.908	0.877	0.915	0.920	K	0.892	0.943	0.964	0.942	0.942	0.974	0.975	0.935	0.937	0.904	0.939	0.890
AlIV	0.142	0.177	0.164	0.100	0.194	0.196	0.368	0.177	0.278	0.197	0.172	0.196	AlIV	0.197	0.012	0.025	0.199	0.051	0.022	0.037	0.141	0.170	0.263	0.281	0.234
Mg/(Mg+Fe)	0.887	0.880	0.888	0.826	0.879	0.878	0.817	0.880	0.838	0.858	0.886	0.885	Mg/(Mg+Fe)	0.860	0.937	0.940	0.657	0.933	0.934	0.937	0.859	0.850	0.658	0.825	0.681
